# Supplementary material
Source: MDPI journal article supplement (https://www.mdpi.com/2073-4352/11/10/1256)
Supplement: s1 [file s1]

## Supplementary material

### **Oxidative Thermal Conversion of Hydrothermal Derived Precursors toward the Mixed-Metal Cobaltite Spinel Oxides ( $\text{ZnCo}_2\text{O}_4$ and $\text{NiCo}_2\text{O}_4$ ): In-Situ Investigation by Synchrotron-Radiation XRD and XAS techniques**

Wanchai Deeloed<sup>1</sup>, Yuranan Hanlumyuang<sup>2</sup>, Wanwisa Limphirat<sup>3</sup>, Songwut Suramitr<sup>1</sup>, Kantapat Chansaenpak<sup>4</sup>, Pongsakorn Kanjanaboos<sup>5</sup>, Suttipong Wannapaiboon<sup>3,\*</sup>, and Worawat Wattanathana<sup>2,\*</sup>

<sup>1</sup> Department of Chemistry, Faculty of Science, Kasetsart University, Bangkok 10900, Thailand; wanchai.de@ku.th (W.D.); fsciswsm@ku.ac.th (S.S.)

<sup>2</sup> Department of Materials Engineering, Faculty of Engineering, Kasetsart University, Bangkok 10900, Thailand; yuranan.h@ku.th (Y.H.); fengwwa@ku.ac.th (W.W.)

<sup>3</sup> Synchrotron Light Research Institute, 111 University Avenue, Suranaree, Muang, Nakhon Ratchasima 30000, Thailand; wanwisa@slri.or.th (W.L.); suttipong@slri.or.th (S.W.)

<sup>4</sup> National Nanotechnology Center, National Science and Technology Development Agency, Thailand Science Park, Khlong Luang 12120, Thailand; kantapat.cha@nanotec.or.th (K.C.)

<sup>5</sup> School of Materials Science and Innovation, Faculty of Science, Mahidol University, Nakhon Pathom 73170, Thailand; pongsakorn.kan@mahidol.edu (P.K.)

\* Corresponding authors e-mail: suttipong@slri.or.th (S.W.); fengwwa@ku.ac.th (W.W.)

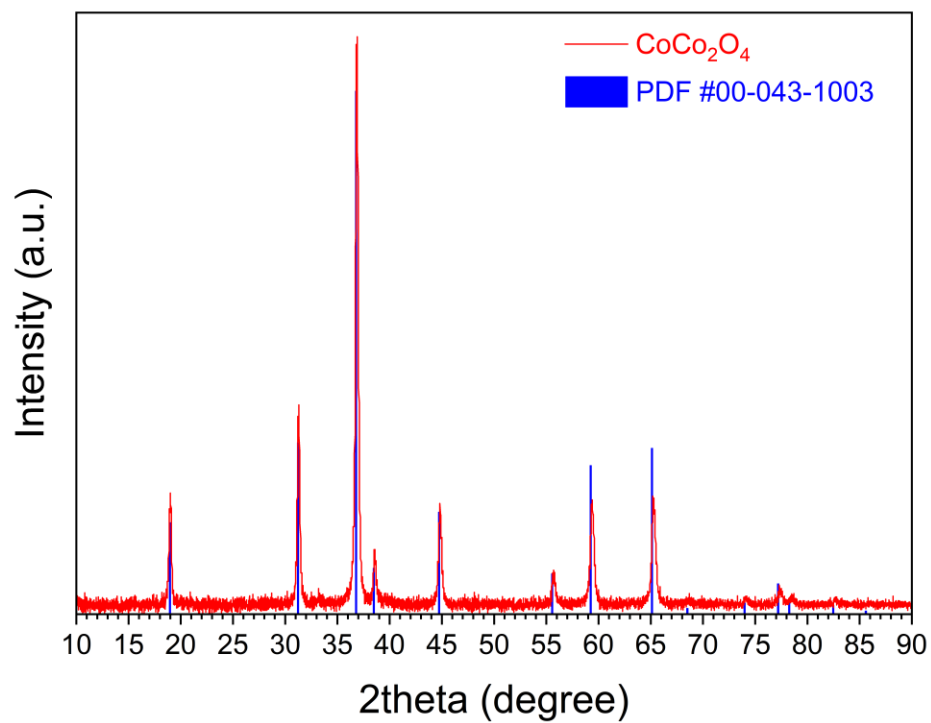

**Figure S1.** XRD profile of  $\text{CoCo}_2\text{O}_4$  spinel oxide sample prepared by calcination of the CCO precursor at 480 °C, 10 hours, under air atmosphere (heating rate = 1 °C·min<sup>-1</sup>).

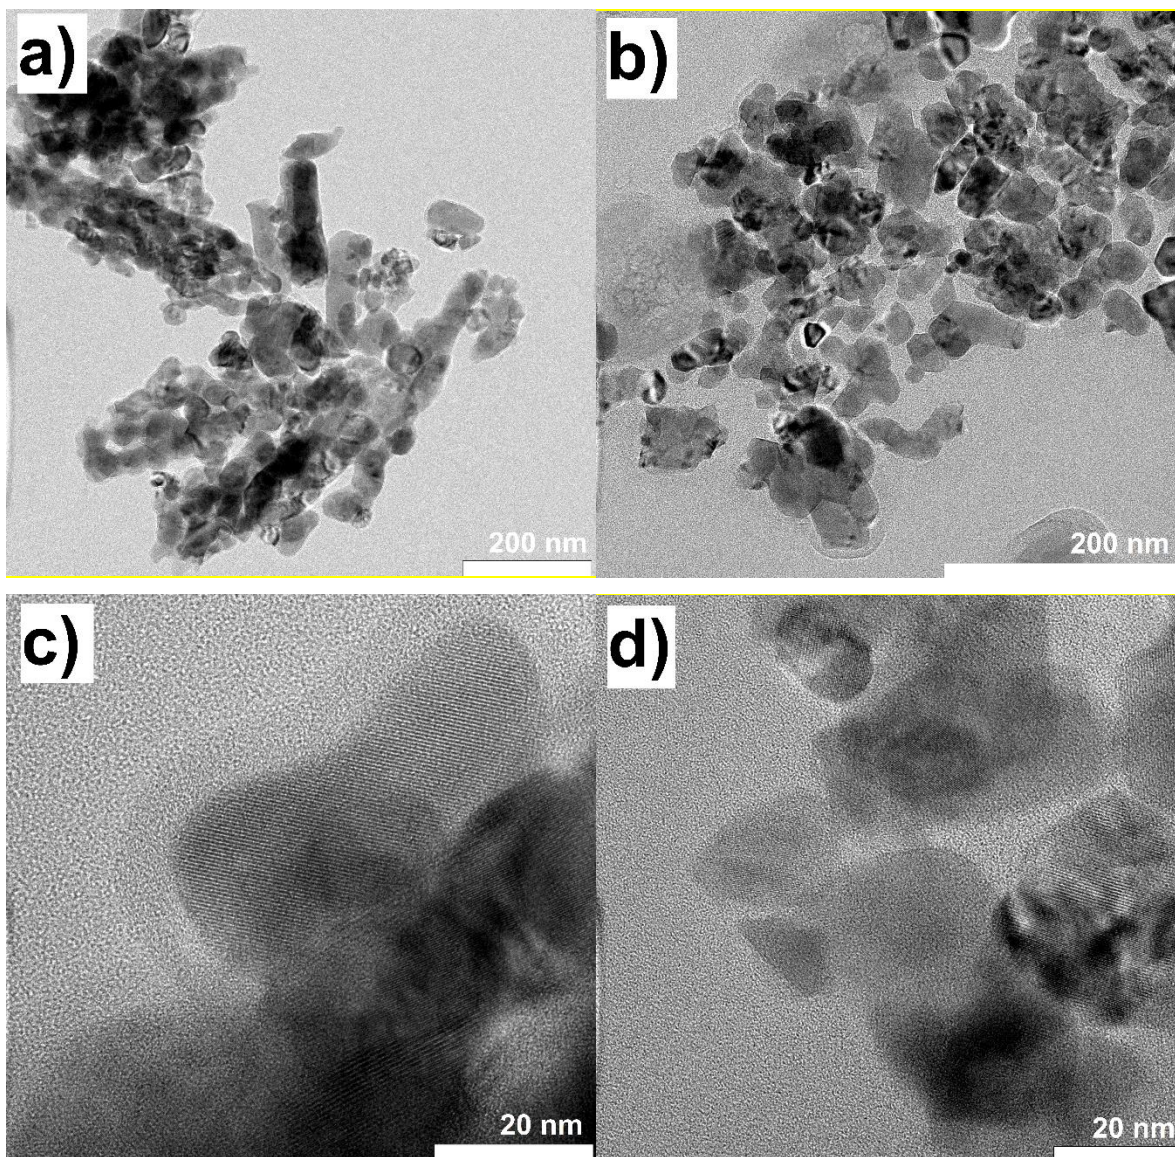

**Figure S2.** TEM images of the (a, c)  $\text{ZnCo}_2\text{O}_4$  and (b, d)  $\text{NiCo}_2\text{O}_4$  spinel oxides obtained by field-emission transmission electron microscope (FETEM, JEOL-JEM-3100F, operating voltage = 300 kV). The spinel oxide sample was prepared by calcining the prepared hydrothermal derived ZCO and NCO precursors at 480 °C in muffle furnace, under air flow for 10 hours (heating rate = 1 °C·min<sup>-1</sup>).

**Table S1.** XRD peak positions of the obtained product (at room temperature) after the thermal conversion of the CCO precursor.

| $2\theta$ (°) | Lattice spacing (Å) | h | k | l | Space group | Crystalline phase                             |
|---------------|---------------------|---|---|---|-------------|-----------------------------------------------|
| 12.71         | 4.6661              | 1 | 1 | 1 | Fd-3m       | <sup>a</sup> CoCo <sub>2</sub> O <sub>4</sub> |
| 20.84         | 2.8569              | 2 | 2 | 0 | Fd-3m       | <sup>a</sup> CoCo <sub>2</sub> O <sub>4</sub> |
| 24.29         | 2.4551              | 1 | 1 | 1 | Fm-3m       | <sup>b</sup> CoO                              |
| 24.50         | 2.4349              | 3 | 1 | 1 | Fd-3m       | <sup>a</sup> CoCo <sub>2</sub> O <sub>4</sub> |
| 25.61         | 2.3311              | 2 | 2 | 2 | Fd-3m       | <sup>a</sup> CoCo <sub>2</sub> O <sub>4</sub> |
| 28.10         | 2.1283              | 2 | 0 | 0 | Fm-3m       | <sup>b</sup> CoO                              |
| 29.66         | 2.0186              | 4 | 0 | 0 | Fd-3m       | <sup>a</sup> CoCo <sub>2</sub> O <sub>4</sub> |
| 36.56         | 1.6470              | 4 | 2 | 2 | Fd-3m       | <sup>a</sup> CoCo <sub>2</sub> O <sub>4</sub> |
| 38.85         | 1.5535              | 5 | 1 | 1 | Fd-3m       | <sup>a</sup> CoCo <sub>2</sub> O <sub>4</sub> |
| 40.17         | 1.5042              | 2 | 2 | 0 | Fm-3m       | <sup>b</sup> CoO                              |
| 42.46         | 1.4267              | 4 | 4 | 0 | Fd-3m       | <sup>a</sup> CoCo <sub>2</sub> O <sub>4</sub> |

<sup>a</sup>PDF #00-043-1003, <sup>b</sup>PDF #00-048-1719

**Table S2.** XRD peak positions of the obtained product (at room temperature) after the thermal conversion of the ZCO precursor.

| $2\theta$ (°) | Lattice spacing (Å) | h | k | l | Space group | Crystalline phase         |
|---------------|---------------------|---|---|---|-------------|---------------------------|
| 12.71         | 4.6661              | 1 | 1 | 1 | Fd-3m       | $\text{ZnCo}_2\text{O}_4$ |
| 20.84         | 2.8563              | 2 | 2 | 0 | Fd-3m       | $\text{ZnCo}_2\text{O}_4$ |
| 24.49         | 2.4361              | 3 | 1 | 1 | Fd-3m       | $\text{ZnCo}_2\text{O}_4$ |
| 25.59         | 2.3331              | 2 | 2 | 2 | Fd-3m       | $\text{ZnCo}_2\text{O}_4$ |
| 29.64         | 2.0200              | 4 | 0 | 0 | Fd-3m       | $\text{ZnCo}_2\text{O}_4$ |
| 36.56         | 1.6471              | 4 | 2 | 2 | Fd-3m       | $\text{ZnCo}_2\text{O}_4$ |
| 38.84         | 1.5538              | 5 | 1 | 1 | Fd-3m       | $\text{ZnCo}_2\text{O}_4$ |
| 42.45         | 1.4269              | 4 | 4 | 0 | Fd-3m       | $\text{ZnCo}_2\text{O}_4$ |

$\text{PDF 00-023-1390}$

**Table S3.** XRD peak positions of the obtained product (at room temperature) after the thermal conversion of the NCO precursor.

| $2\theta$ (°) | Lattice spacing (Å) | h | k | l | Space group | Crystalline phase                             |
|---------------|---------------------|---|---|---|-------------|-----------------------------------------------|
| 12.72         | 4.6635              | 1 | 1 | 1 | Fd-3m       | <sup>d</sup> NiCo <sub>2</sub> O <sub>4</sub> |
| 20.83         | 2.8583              | 2 | 2 | 0 | Fd-3m       | <sup>d</sup> NiCo <sub>2</sub> O <sub>4</sub> |
| 24.46         | 2.4389              | 3 | 1 | 1 | Fd-3m       | <sup>d</sup> NiCo <sub>2</sub> O <sub>4</sub> |
| 25.61         | 2.3310              | 2 | 2 | 2 | Fd-3m       | <sup>d</sup> NiCo <sub>2</sub> O <sub>4</sub> |
| 29.63         | 2.0204              | 4 | 0 | 0 | Fd-3m       | <sup>d</sup> NiCo <sub>2</sub> O <sub>4</sub> |
| 36.50         | 1.6497              | 4 | 2 | 2 | Fd-3m       | <sup>d</sup> NiCo <sub>2</sub> O <sub>4</sub> |
| 38.84         | 1.5538              | 5 | 1 | 1 | Fd-3m       | <sup>d</sup> NiCo <sub>2</sub> O <sub>4</sub> |
| 42.38         | 1.4292              | 4 | 4 | 0 | Fd-3m       | <sup>d</sup> NiCo <sub>2</sub> O <sub>4</sub> |

<sup>d</sup>PDF 01-073-1702
